# Supplementary material for: Automated snow avalanche release area delineation in data-sparse, remote, and forested regions
Source: Copernicus journal article supplement (doi:10.5194/nhess-22-3247-2022), 2022-10-10
Supplement: Supplementary file 1 [file nhess-22-3247-2022-supplement.pdf]

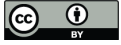

*Supplement of*

**Automated snow avalanche release area delineation in data-sparse,  
remote, and forested regions**

**John Sykes et al.**

*Correspondence to:* John Sykes ([john\\_sykes@sfu.edu](mailto:john_sykes@sfu.edu))

The copyright of individual parts of the supplement might differ from the article licence.

# 1 **DSM production in mountainous, forested terrain using SPOT 6 tri-** 2 **stereo imagery with Ames Stereo Pipeline**

## 3 **1 Overview**

4 This document summarizes our workflow to create a 5m DSM for high resolution potential avalanche release area modelling  
5 using SPOT6 tri-stereo imagery and open source software tools. The primary tools used are QGIS, GDAL, and Ames Stereo  
6 Pipelines (ASP). ASP requires a Linux or Mac operating system, detailed instructions on downloading and using the software  
7 are available from the developers (Beyer et al., 2019). Due to the computer processing resources necessary for creating high  
8 resolution DSM using ASP we utilized the Compute Canada research computing system (<https://www.computecanada.ca/>).  
9 The processing settings presented in this document are oriented towards that computer system.

10 Our DSM workflow is broken into three steps: 1. Pre-processing the imagery 2. Producing stereo DSM point clouds 3. Post-  
11 processing DSM output into a final product. The pre-processing covers taking the imagery from the raw format we received  
12 from the imagery providers and converts it into a stereo ready product. The DSM production briefly describes how we  
13 customized the ASP settings to produce an accurate DSM in forested and mountainous terrain. The post-processing details  
14 how we combined the output DSMs into a single mosaic and filled holes using existing DEM data. The data and processing  
15 settings from our research are available in our Open Science Framework (OSF) directory (<https://osf.io/yq5s3/>)

## 16 **1.1 Imagery pre-processing**

### 17 **1.1.1 Image mosaic**

18 Each of the images for our study area were delivered in two separate tiles, with the majority of the study area captured in one  
19 tile. In order to georeference and orthorectify the imagery with ASP we merged the tiles using the GDAL build virtual raster  
20 tool. The raw imagery files we purchased had no spatial reference system which makes it trickier to use standard GIS tools.  
21 The spatial reference data is contained in separate rational polynomial coefficient (RPC) files which were used as input to  
22 subsequent ASP processing tools to georeference the imagery.

### 23 **1.1.2 Bundle adjustment**

24 The ASP bundle adjustment tool allows users to input ground control points (GCP) to aid in accurately georeferencing image  
25 files. We collected a large dataset of GCP using a Trimble handheld DGNS unit and post processed the points with the  
26 Trimble pathfinder software. The final GCP data set was composed of a point shapefile with attributes for the coordinates,  
27 elevation, and error estimates. To apply the GCP to our imagery required manually identifying their locations in each of the  
28 SPOT6 tri-stereo images. Our process of carrying this out was time consuming and required manually recording the pixel

29 coordinates from the SPOT6 images for each GCP. We used Google Earth imagery and photographs taken during the GCP  
30 data collection to help locate precise GCP locations in the SPOT6 images. Including GCP in ASP required a text file with the  
31 following structure:

32 Point #, lat, long, elev, sd lat, sd long, sd elev, Image file, column, row, sd column, sd row

33 You can include multiple image files for each GCP with distinct column and row numbers for each image, in our case we had  
34 three images. To estimate the standard deviation for the GCP we used the error estimates from the GPS post processing  
35 software. We used the QGIS line measurement tool to estimate the standard deviations of the column and row numbers based  
36 on how accurately we could identify the location of each GCP. Here is an example line from our .gcp file, see  
37 'SPOT6\_GCP.gcp' in the OSF directory for complete copy of GCP file:

38 50, 50.877556716, -117.412691840, 2223.398, 0.2, 0.2, 0.2, \$Image\_1, 10062.57, 2545.97, 0.8, 0.8, \$Image\_2, 10951.96,  
39 2425.2, 0.8, 0.8, \$Image\_3, 10943.38, 2595.82, 0.8, 0.8

40 We selected 27 out of 66 GCP for the bundle adjust tool based on the accuracy of the points and the distribution across the  
41 area and elevation of the study area. We evaluated the accuracy of the bundle adjust tool using the residual errors found in the  
42 '-final\_residuals\_no\_loss\_function\_averages.txt' file. The mean residual error for our GCP bundle adjustment was 2.43 m.  
43 We detected a notable improvement in the visual alignment of the images compared to the GCP points. One challenge we  
44 experienced was that some of our GCP were located near steep terrain which led to higher residual errors for these points.  
45 However, we elected to keep these points in the bundle adjustment GCP data set because the visual alignment of the imagery  
46 was better overall compared to tests with smaller sets of GCP. Here is a sample of our use of the bundle adjustment for our  
47 images:

48 Bundle\_adjust \$Image\_1 \$Image\_2 \$Image\_3 \$RPC\_1 \$RPC\_2 \$RPC\_3 --robust-threshold 10 -o  
49 \$OUTPATH/CMHGLfinal\_27GCPrt10 -t rpc

### 50 **1.1.3 Point cloud alignment**

51 Based on the recommendation of the ASP developers we processed our imagery through ASP multiple times to improve the  
52 alignment with our GCP data in steep terrain. In the first iteration we orthorectified our bundle adjusted imagery onto the ~18m  
53 Canadian national DEM (CDEM) prior to stereo processing. The output of this process, SPOT6\_DEMv1, was used as the  
54 orthorectification layer in our second iteration. To improve the alignment between SPOT6\_DEMv1 and our GCP we used the  
55 point cloud alignment (pc align) tool. This process involves converting the .gcp file into a point cloud by extracting the latitude,  
56 longitude, and height coordinates from each point. The SPOT6\_DEMv1 layer and GCP point cloud are then aligned using the  
57 pc align tool and the inverse transform of the alignment is saved in order to apply the alignment to the reference layer, which

58 in our case was the SPOT6\_DEMv1. See Shean et al., 2016 and the ASP book for a detailed description of this process. See  
59 ‘GCP\_pc.csv’ in the OSF directory for a copy of our GCP point cloud file. Here is a sample code for applying the pc align  
60 tool:

```
61 pc_align SPOT6_DEMv1.tif GCP_pc.csv --max-displacement 100 --save-inv-transformed-reference-points -o GCP27_align
```

62 The output of pc align is a point cloud which needs to be converted back to a DEM for input to the orthorectification tool:

```
63 point2dem GCP27_align-trans_reference.tif --dem-spacing 20 -o SPOT6_DEMv1.1_20m_align --threads 8
```

#### 64 **1.1.4 Map projection**

65 The final step in pre-processing the imagery for the stereo pipeline is to apply the map project tool, which orthorectifies the  
66 images onto a local DEM. This process corrects the geometry of the raw images and improves pixel matches in steep terrain.  
67 As mentioned previously, we carried out this step twice. First using the CDEM as input and second using the aligned  
68 SPOT6\_DEMv1 as input. This was suggested by ASP developers to improve performance in steep terrain. The map project  
69 tool uses the output of the bundle adjust tool as well as the RPC data from the raw imagery and a local DEM to correct the  
70 geometry of the images. Here is a code sample for one of the images from our study area:

```
71 mapproject -t rpc --mpp 1.5 --ot UInt16 --bundle-adjust-prefix $GCP_BA_path $SPOT6_DEMv1.1_20m_align.tif $Image_1  
72 $RPC_1 $Output_Image
```

73 In summary our pre-processing workflow creates a single mosaic from the raw images, uses GCP to accurately georeference  
74 the images (bundle adjust), aligns our orthorectification DEM to the GCP point cloud (pc align), and orthorectifies the imagery  
75 using the aligned DEM (map project). We developed this rather complex workflow to help improve the performance of ASP  
76 in forested and steep terrain, which makes up the majority of our imagery. Our impression is that overall we saw large  
77 improvements in these areas thanks to the careful pre-processing.

#### 78 **1.2 Stereo**

79 We tested a variety of stereo input parameters to optimize performance in our study area. The best performance was achieved  
80 with the smooth semi global matching (SGM) stereo correlation algorithm using the following input parameters: stereo  
81 algorithm (2 - smooth SGM), cost mode (3 - census transform), kernel size (3, 3), median filter size (5), texture smooth size  
82 (25), and texture smooth scale (0.15). We chose to use parameters that created a smoother DSM with less artifacts and overall  
83 surface roughness because our application is modelling of avalanche release areas, where the snowpack naturally creates a  
84 smoothed ground surface. For applications where detecting small scale bare ground surface roughness is desirable we

85 recommend decreasing the median filter size, texture smooth size, and texture smooth scale parameters. A copy of our stereo  
86 default file is available in the OSF directory to reproduce the stereo settings that we used.  
87 We processed each pairwise combination of the SPOT6 tri-stereo imagery, which resulted in six output DSMs. This approach  
88 takes advantage of the three viewing angles of the tri-stereo imagery and aims to minimize the number of DEM holes due to  
89 shading and cloud cover. Using the Compute Canada cedar research computer cluster we allocated 48 CPUs working on 12  
90 parallel processing tasks and roughly 190 gb of RAM to generate the DSMs. For more details on parallel processing efficiency  
91 for high resolution stereo imagery see the ASP book or Shean et al., 2016.

## 92 **1.3 DSM post-processing**

### 93 **1.3.1 Point cloud to DSM**

94 To process the six output point clouds from the stereo tool into DEM layers and remove pixels with triangulation errors greater  
95 than the original image pixel size (1.5 m) we used the point to DEM tool (point2DEM). Our output DEM had a resolution of  
96 5m based on the requirements of our PRA modelling and the original imagery resolution. We used the hole filling function of  
97 point to DEM to interpolate across small holes in the DSM layers up to 10 pixels. To quantify the errors of our stereo workflow  
98 we also produced an error image using point to DEM which produces an additional image whose values represent the  
99 triangulation ray intersection error in meters. Here is a sample of our code:

```
100 point2dem $PC_1 --dem-spacing 5 -o $OUTPATH/DEM1 --errorimage --threads 8 --max-valid-triangulation-error 1.5 --dem-  
101 hole-fill-len 10
```

### 102 **1.3.2 DSM mosaic**

103 To merge our 6 output DSMs we used the DEM mosaic tools with the default blending type. We tested several different  
104 approaches for blending and hole filling using this tool and found that simply applying the default method to the entire list of  
105 6 DSM created the most consistent and artifact free output. We also generated normalized median absolute deviation (NMAD)  
106 and standard deviation (SD) layers between the 6 input DSMs using this tool.

```
107 dem_mosaic --threads 8 $DEM_1 $DEM_2 $DEM_3 $DEM_4 $DEM_5 $DEM_6 -o $OUTDIR/DSM_mosaic.tif
```

108 After generating the DSM mosaic we manually identified artifacts and errors in the final output by creating a polygon shapefile.  
109 We used the shapefile to remove portions of the DSM mosaic with significant errors by clipping the DSM mosaic raster with  
110 the polygon dataset. Most of the areas with errors and artifacts either had cloud cover in multiple images or were shaded and  
111 very steep north facing terrain.

### 112 **1.3.3 Point cloud align**

113 With our DSM mosaic complete and any artifacts removed we then performed a final iteration of pc align using the DSM  
114 mosaic as the reference layer and the GCP point cloud as the source layer. Using the same process described for creating the  
115 orthorectification DEM, we saved in inverse transform and applied it to the DSM mosaic. This further improves the alignment  
116 of the DSM mosaic to the GCP. We also performed pc align with the Canadian national DEM to improve the alignment to our  
117 DSM, using the aligned DSM mosaic as the reference layer and the Canadian national DEM and the source layer.

### 118 **1.3.4 DEM mosaic**

119 The final step in our DSM pipeline is to fill in holes with the best available DEM. In our case that is the Canadian national  
120 DEM (CDEM) which has a native resolution of ~18m. Prior to aligning the CDEM with the DSM mosaic using pc align, we  
121 down sampled the CDEM to 5m to match our DSM resolution and pixel spacing. We then used DEM mosaic to blend the final  
122 DSM and CDEM together within a 60 m buffer of any remaining holes. We tested a wide range of blending lengths to determine  
123 the optimal balance of preserving the accuracy of the DSM while avoiding artifacts around the filled holes. This process  
124 inevitably results in smoothing of the DSM mosaic in the areas adjacent to holes, but it was necessary to avoid abrupt transitions  
125 between the boundaries of the DSM layer and the CDEM. For our modelling purposes abrupt transitions would result in  
126 unrealistic output from dynamic avalanche simulation software, which is more of a concern than having smoothed values  
127 around DEM holes.

```
128 dem_mosaic $DSM_mosaic $CDEM_5m --priority-blending-length 60 --weights-blur-sigma 5 --weights-exponent 2 -o  
129 $OUTPATH/SPOT6_DEMv2.tif
```

### 130 **References**

131 Beyer, R., Alexandrov, O., and McMichael, S.: NeoGeographyToolkit/StereoPipeline: Ames Stereo Pipeline version 2.6.2,  
132 <https://doi.org/10.5281/zenodo.3247734>, 2019.

133 GDAL Contributors: GDAL/OGR Geospatial Data Abstraction software Library., 2021.

134 QGIS Development Team: QGIS Geographic Information System, [online] Available from: <http://qgis.org>, 2021.

135 Shean, D. E., Alexandrov, O., Moratto, Z. M., Smith, B. E., Joughin, I. R., Porter, C., and Morin, P.: An automated, open-  
136 source pipeline for mass production of digital elevation models (DEMs) from very-high-resolution commercial stereo satellite  
137 imagery, 116, 101–117, <https://doi.org/10.1016/j.isprsjprs.2016.03.012>, 2016.

138 Sykes, J., Haegeli, P., and Bühler, Y.: Automated snow avalanche release areas delineation in data sparse, remote, and forested  
139 regions -- Code and Data, <https://doi.org/10.17605/OSF.IO/YQ5S3>, 2021.
